# Supplementary material for: Summary of Reported Whale-Vessel Collisions in Alaskan Waters
Source: Hindawi journal article supplement (doi:10.1155/2012/106282), 2012-01-01
Supplement: f1 [file 106282.f1.pdf]

Appendix 1. Summary of whale-vessel collisions reported in Alaska 1978-2011 (n = 108). Rejected reports are not included.

| NMFS<br>Record # | Date      | Location                                 | Confidence<br>category                                 | Species struck<br>[age class, sex]                                    | Fate of whale                               | Vessel type<br>[length]             | Vessel speed at<br>time of collision                                                                                                                                     | Description of event                                                                                                                                                                                                                                                                                                                                                                                                                                                                                                                                                                                                                                                            |
|------------------|-----------|------------------------------------------|--------------------------------------------------------|-----------------------------------------------------------------------|---------------------------------------------|-------------------------------------|--------------------------------------------------------------------------------------------------------------------------------------------------------------------------|---------------------------------------------------------------------------------------------------------------------------------------------------------------------------------------------------------------------------------------------------------------------------------------------------------------------------------------------------------------------------------------------------------------------------------------------------------------------------------------------------------------------------------------------------------------------------------------------------------------------------------------------------------------------------------|
| 1978050          | 6/22/78   | Eastern Channel,<br>Sitka                | probable strike                                        | humpback whale<br>[age class & sex unknown]                           | dead                                        | cruise ship<br>[190 m]              | unknown                                                                                                                                                                  | Cruise ship reported that they had struck something, believed to be a whale. Three days later a dead humpback whale was found beach-cast within 3 km of the reported incident. Carcass was examined but there was no necropsy. No major external injuries were visible.                                                                                                                                                                                                                                                                                                                                                                                                         |
| 1986121          | 6/15/1986 | Garforth Island,<br>Glacier Bay          | definite strike                                        | humpback whale<br>[adult based on > 5 yr<br>sighting history, female] | minor injury<br>(known to have<br>survived) | commercial recreational<br>[19.8 m] | ~5 kn (vessel was going 10 kn<br>or less when whale surfaced in<br>front of bow, captain put<br>engine in reverse, collision<br>occurred while engine was in<br>reverse) | A whale surfaced unexpectedly 5 m ahead, crossly perpendicular to the bow. Captain reported striking the whale with the bow as the whale arched its back. Felt the bow contact the whale and the vessel listed to starboard. Three passengers were knocked to the deck but none reported injuries. The initial injury to the whale, identified as SE Alaska ID #535, was a v-shaped abrasion with broken skin on dorsal caudal peduncle. Whale #535 was resighted the next day and some blood may have been visible. Resighted again on 7/1/86 and wound was still visible but healing. #535 has been sighted repeatedly in subsequent years with no visible injuries or scars. |
| 1986111          | 6/24/1986 | Point Retreat,<br>Juneau                 | definite strike<br>(whale struck<br>stationary vessel) | humpback whale<br>[age class & sex unknown]                           | unknown                                     | private recreational<br>[8 m]       | at anchor                                                                                                                                                                | Vessel was anchored and fishing with whales all around it when it was struck by a whale and lifted 0.6 m out of the water. The impact punched a 0.3 m long gash into the bow of the fiberglass and wood hull along the keel.                                                                                                                                                                                                                                                                                                                                                                                                                                                    |
| 1986122          | 7/1/1986  | Taku Inlet                               | definite strike<br>(whale struck<br>stationary vessel) | humpback whale<br>[age class & sex unknown]                           | unknown                                     | private recreational<br>[7 m]       | drifting with engine off                                                                                                                                                 | Owner of vessel reported that his boat had been dead in the water when a whale "whacked" him.                                                                                                                                                                                                                                                                                                                                                                                                                                                                                                                                                                                   |
| none             | 6/9/1987  | Point Adolphus,<br>Icy Strait            | definite strike                                        | humpback whale<br>[age class & sex unknown]                           | minor injury<br>(known to have<br>survived) | commercial recreational<br>[8 m]    | unknown (likely 1-11 kn<br>because vessel was actively<br>whale-watching)                                                                                                | SE Alaska ID #875 was observed with fresh propeller lacerations penetrating through to blubber on left flank after a vessel was observed closely approaching the pod repeatedly. Did not observe the collision or blood, but suspected that the whale's injuries were from the vessel. Whale #875 sighted repeatedly in subsequent years with propeller scars on left flank.                                                                                                                                                                                                                                                                                                    |
| 87013            | 7/17/1987 | Little Port Walter,<br>SE Baranof Island | probable strike                                        | humpback whale<br>[12.0 m adult, female]                              | dead                                        | unknown                             | unknown                                                                                                                                                                  | Carcass was examined but there was no necropsy. Whale had a 3.8 m long by 1 m deep cut on its ventral side penetrating into the abdominal cavity with several cut ribs projecting.                                                                                                                                                                                                                                                                                                                                                                                                                                                                                              |
| 87012            | 7/31/1987 | Sitka Sound                              | probable strike                                        | humpback whale<br>[7.3 m calf, male]                                  | dead                                        | unknown                             | unknown                                                                                                                                                                  | Carcass was examined but there was no necropsy, however there was extensive bruising on the whale's head (J. Straley, pers. obs.).                                                                                                                                                                                                                                                                                                                                                                                                                                                                                                                                              |

| NMFS<br>Record # | Date                    | Location                                                | Confidence<br>category | Species struck<br>[age class, sex]                 | Fate of whale   | Vessel type<br>[length]                  | Vessel speed at<br>time of collision                                              | Description of event                                                                                                                                                                                                                                                                                                                                                        |
|------------------|-------------------------|---------------------------------------------------------|------------------------|----------------------------------------------------|-----------------|------------------------------------------|-----------------------------------------------------------------------------------|-----------------------------------------------------------------------------------------------------------------------------------------------------------------------------------------------------------------------------------------------------------------------------------------------------------------------------------------------------------------------------|
| none             | late 1980s              | south of Fiver<br>Finger Lighthouse,<br>Frederick Sound | definite strike        | humpback whale<br>[age class & sex unknown]        | unknown         | research vessel<br>[11 m]                | 1- 5 kn                                                                           | Research vessel had just biopsied or attempted to biopsy a whale. As the whale dove right next to the boat, they felt a glancing blow as the whale's flukes brushed against the bow near the water line. The collision did not jolt the boat; it felt very minor. Whale dove normally and there was no damage to the boat. Exact date unknown; month was probably August.   |
| 91010            | 8/3/1991                | Little Port Walter,<br>SE Baranof Island                | definite strike        | humpback whale<br>[7.5 m calf, male]               | dead            | unknown                                  | unknown                                                                           | The calf's skull was shattered from the top of the cranium to the base of the skull and the animal was in good body condition (J. Straley, pers. obs.).                                                                                                                                                                                                                     |
| 1991031          | 11/25/1991              | Eastern Channel,<br>Sitka                               | definite strike        | humpback whale<br>[age class & sex unknown]        | unknown         | private recreational<br>[length unknown] | ≥ 12 kn (in transit on step, cut<br>engine when whale surfaced in<br>boat's path) | Whale surfaced immediately in front of vessel, heading towards it. Operator cut the engine and the skiff came off step, but the backwash pushed the boat up onto the whale's back before it slipped off to one side.                                                                                                                                                        |
| none             | 8/10/1992               | Point Adolphus,<br>Icy Strait                           | probable strike        | humpback whale<br>[age class & sex unknown]        | unknown         | commercial recreational<br>[15 m]        | ~2-4 knots                                                                        | Vessel was observed harassing humpback whales, including approaching and likely bumping a single humpback whale.                                                                                                                                                                                                                                                            |
| 1993037          | unknown date<br>in 1993 | Windy Passage,<br>south of Sitka                        | definite strike        | humpback whale<br>[age class & sex unknown]        | unknown         | private recreational<br>[6 m]            | unk                                                                               | Skiff was transiting "at a pretty good rate" when a whale came up right in front of it. It was so sudden they could not take evasive action. They hit the whale straight on and the bow flew up into the air and water came over the sides.                                                                                                                                 |
| 1994074          | 6/1/1994                | near Halibut Point, Sitka<br>Sound                      | definite strike        | humpback whale<br>[age class & sex unknown]        | external injury | commercial recreational<br>[7 m]         | ~20 kn but seconds before<br>collision, backed off on<br>throttle                 | Whale surfaced ~6-15 m ahead of vessel, crossing its path. Bow of boat hit the whale along its back or flank with a "glancing blow", found several small pieces of whale skin on bow and fiberglass hull sustained substantial damage with cracks. The whale was seen leaving the area following the collision with no obvious signs of injury.                             |
| 95010            | 6/1/1995                | Shakan Bay,<br>Sumner Strait                            | definite strike        | likely humpback whale<br>[age class & sex unknown] | unknown         | commercial fishing<br>[27 m]             | 9 kn                                                                              | The captain reported that his vessel struck what he believed was a humpback whale. The whale was struck almost head-on along the port bow. They reported seeing the animal's pectoral fin extended to one side. After striking the whale, they observed it swimming in circles before contact with the animal was lost. There was no damage to the vessel.                  |
| 1995034          | 6/8/1995                | south of Admiralty<br>Island, Frederick<br>Sound        | definite strike        | humpback whale<br>[age class & sex unknown]        | unknown         | private recreational<br>[6 m]            | 30 kn                                                                             | Vessel operator saw 3-4 whales and "expected them to stay in deeper waters" but then noticed bubbles in the water. A whale suddenly surfaced < 30 m from shore and the skiff hit the whale's back. The skiff went airborne and threw the two passengers into the water. The impact tore the engine covers off the outboards and pulled two batteries from their strappings. |

| NMFS<br>Record # | Date      | Location                                                                             | Confidence<br>category                                 | Species struck<br>[age class, sex]                    | Fate of whale | Vessel type<br>[length]           | Vessel speed at<br>time of collision                          | Description of event                                                                                                                                                                                                                                                                                                                                                                                                                                                                         |
|------------------|-----------|--------------------------------------------------------------------------------------|--------------------------------------------------------|-------------------------------------------------------|---------------|-----------------------------------|---------------------------------------------------------------|----------------------------------------------------------------------------------------------------------------------------------------------------------------------------------------------------------------------------------------------------------------------------------------------------------------------------------------------------------------------------------------------------------------------------------------------------------------------------------------------|
| 1995035          | 7/2/1995  | ~3.2 km off Big Creek,<br>Frederick Sound                                            | definite strike<br>(whale struck<br>stationary vessel) | humpback whale<br>[age class & sex unknown]           | unknown       | commercial recreational<br>[11 m] | drifting with engine off                                      | Vessel had whales all around it when one whale started to approach the boat. The whale breached right next to the boat and landed on it. Three of five passengers were knocked into the water but no one was badly hurt. Vessel sustained \$10,000 worth of damage (railing was ripped off, aluminum hull and part of the metal deck were dented and a hatch was wrenched open).                                                                                                             |
| 95015            | 7/27/1995 | off Fern Point, on the<br>east coast of San<br>Fernando Island just<br>west of Craig | definite strike<br>(whale struck<br>stationary vessel) | humpback whale<br>[age class & sex unknown]           | unknown       | private recreational<br>[5 m]     | drifting with engine off                                      | Skiff cut engine and was drifting in choppy seas. Earlier they had seen a whale ~1 km away. Suddenly a whale hit the bow and two passengers were thrown into the water. One passenger hit his head and chest on the boat rail before falling overboard. The other passenger fell overboard and then the whale hit him with its flukes, cracking one of his ribs and pushing him down in the water ~5 m. The skiff was dented and there was minor damage to the engine that required repairs. |
| 96006            | 5/16/1996 | near Blying Sound,<br>southeast coast of<br>Kenai Peninsula,<br>Gulf of Alaska       | definite strike                                        | unidentified large whale<br>[age class & sex unknown] | severe injury | US Coast Guard cutter<br>[115 m]  | 15 kn                                                         | Whale surfaced ~46 m ahead of the cutter. An attempt was made to avoid the whale, but a shudder was felt throughout the ship indicating a collision. The ship circled back and found blood in the water but did not see an injured or dead whale. Two live whales were spotted in the area. The crew believes that although likely, it is unknown if the whale was killed. The ship was not damaged.                                                                                         |
| temp96a          | 8/17/1996 | between Amalga<br>Harbor and Point<br>Retreat, Juneau                                | definite strike                                        | humpback whale<br>[age class & sex unknown]           | unknown       | private recreational<br>[8 m]     | 20 kn                                                         | A nearby vessel reported seeing a humpback whale surface close to the vessel's port side and immediately the vessel went airborne. One passenger suffered two broken ribs, everyone onboard had cuts and bruises and there was superficial damage to the vessel. No one onboard the vessel that hit the whale saw it before the collision.                                                                                                                                                   |
| 97016            | 5/20/1997 | ~0.4 km south of<br>Kah Shakes Cove,<br>near Ketchikan                               | definite strike                                        | gray whale<br>[11.0 m subadult, female]               | dead          | unknown                           | unknown                                                       | Carcass was observed from the air with a deep gash on the top of its head. It was examined and photographed the next day and the wound was confirmed to be consistent with a vessel collision.                                                                                                                                                                                                                                                                                               |
| 97200            | 5/29/1997 | Kenai Fjords National<br>Park                                                        | definite strike                                        | humpback whale<br>[age class & sex unknown]           | unknown       | commercial fishing<br>[10 m]      | unknown                                                       | Captain reported hitting a bubble-feeding humpback whale. No further details were available.                                                                                                                                                                                                                                                                                                                                                                                                 |
| 97025            | 5/29/1997 | between Aialik Bay<br>and Chiswell Islands,<br>Kenai Fjords                          | definite strike                                        | humpback whale<br>[age class & sex unknown]           | unknown       | commercial recreational<br>[29 m] | 22 kn but throttled back when<br>whale surfaced ahead of ship | Whale surfaced unexpectedly almost directly ahead of ship. The captain immediately swerved and throttled back, but the vessel struck the whale hard. The vessel rode up slightly on the whale and a 0.6 m by 0.9 m stabilizer fin was broken away from the bottom of the hull. Whale reportedly continued feeding and exhibited no unusual behavior.                                                                                                                                         |

| NMFS<br>Record # | Date       | Location                                                  | Confidence<br>category                                 | Species struck<br>[age class, sex]                        | Fate of whale | Vessel type<br>[length]                | Vessel speed at<br>time of collision                          | Description of event                                                                                                                                                                                                                                                                                                                                                                                                                                                                                            |
|------------------|------------|-----------------------------------------------------------|--------------------------------------------------------|-----------------------------------------------------------|---------------|----------------------------------------|---------------------------------------------------------------|-----------------------------------------------------------------------------------------------------------------------------------------------------------------------------------------------------------------------------------------------------------------------------------------------------------------------------------------------------------------------------------------------------------------------------------------------------------------------------------------------------------------|
| 97032            | 7/12/1997  | NW Shelter Island,<br>Juneau                              | definite strike<br>(whale struck<br>stationary vessel) | humpback whale<br>[age class & sex unknown]               | unknown       | private recreational<br>[5 m ]         | drifting with engine off                                      | Skiff was drifting with the engine off when it was capsized by a surfacing whale. The two passengers onboard were thrown into the water and the engine was destroyed. Total damage was estimated to be \$10,000.                                                                                                                                                                                                                                                                                                |
| none             | 8/18/1997  | outside Blue Mouse<br>Cove, Glacier Bay                   | definite strike<br>(whale struck<br>stationary vessel) | humpback whale<br>[age class & sex unknown]               | unknown       | non-motorized recreational<br>[6 m]    | drifting                                                      | Whale surfaced under canoe. The canoe slid off the whale's back but did not capsize.                                                                                                                                                                                                                                                                                                                                                                                                                            |
| 97056            | 10/12/1997 | ~97 km SW of<br>Middleton Island,<br>Prince William Sound | definite strike                                        | sperm whale<br>[age class & sex unknown]                  | unknown       | commercial fishing<br>[length unknown] | unknown                                                       | Captain believes he hit the whale on its tail with the bow of his vessel. The whale had been feeding on his black cod catch. The whale appeared undisturbed and continued feeding nearby.                                                                                                                                                                                                                                                                                                                       |
| 1998136          | 7/13/1998  | Marmot Bay, Kodiak                                        | possible strike                                        | likely Cuvier's beaked whale<br>[age class & sex unknown] | dead          | unknown                                | unknown                                                       | Report is based on U.S. Coast Guard video from helicopter. Carcass was floating dorsal side up with the head turned at an angle almost perpendicular to the body, giving the impression of a deep v-cleft.                                                                                                                                                                                                                                                                                                      |
| 98020            | 7/14/1998  | Bear Glacier beach<br>front, Seward                       | possible strike                                        | Stejneger's beaked whale<br>[5.5 m adult, sex unknown]    | dead          | unknown                                | unknown                                                       | Decomposed carcass found beach-cast. Right flank showed signs of possible collision trauma with some of the ribs separated from each other. Species confirmed with genetic analysis of tissue sample.                                                                                                                                                                                                                                                                                                           |
| 1998060          | 8/11/1998  | ~0.4 km north of<br>North Island, Juneau                  | definite strike                                        | humpback whale<br>[age class & sex unknown]               | unknown       | commercial recreational<br>[24 m]      | 2 kn but captain had just put<br>engines in full reverse idle | Whale surfaced under and between the hulls of a forward idling whale watch catamaran. The collision was reported to be a "glancing blow" and the whale was seen breathing and diving with no apparent injuries. Another whale watch vessel in the area reported seeing no injured whales in the area following the collision.                                                                                                                                                                                   |
| 1998074          | 9/24/1998  | North Pass, Juneau                                        | definite strike                                        | humpback whale<br>[age class & sex unknown]               | unknown       | commercial recreational<br>[7 m]       | 15-18 kn                                                      | Vessel ran up on the dorsal side of the whale behind its blowhole. The impact tipped the boat and two passengers were knocked across the cabin; one bruised her ribs. The whale dove and hit the auxiliary outboard engine, knocking it loose, and cracked the hull on the port side of the bow. Other whales in the group came to the injured whale, circled it and swam off together. The group of whales was observed for a while by other charter boats who saw no apparent injuries or change in behavior. |
| 1999132          | 6/21/1999  | Point Coke, entrance<br>to Tracy Arm,<br>Stephens Passage | definite strike<br>(whale struck<br>stationary vessel) | probable humpback whale<br>[age class & sex unknown]      | unknown       | commercial fishing<br>[10 m]           | at anchor                                                     | Vessel was anchored with longline fishing gear soaking in the water. Did not see the strike occur, but reported that it felt like a rear end collision at 20 mph. Bottom of the vessel was damaged.                                                                                                                                                                                                                                                                                                             |

| NMFS<br>Record # | Date       | Location                                       | Confidence<br>category                                 | Species struck<br>[age class, sex]          | Fate of whale   | Vessel type<br>[length]         | Vessel speed at<br>time of collision | Description of event                                                                                                                                                                                                                                                                                                                                                                                                                                                                                                                                                                                                             |
|------------------|------------|------------------------------------------------|--------------------------------------------------------|---------------------------------------------|-----------------|---------------------------------|--------------------------------------|----------------------------------------------------------------------------------------------------------------------------------------------------------------------------------------------------------------------------------------------------------------------------------------------------------------------------------------------------------------------------------------------------------------------------------------------------------------------------------------------------------------------------------------------------------------------------------------------------------------------------------|
| 1999136          | 7/7/1999   | Whale Bay, Sitka                               | definite strike<br>(whale struck<br>stationary vessel) | humpback whale<br>[age class & sex unknown] | severe injury   | private recreational<br>[22 m]  | at anchor                            | Vessel was anchored with no one onboard when it was struck by a whale. The vessel sank and later a 1.5 m hole was discovered in the hull. Inside the splintered hull, they found six plates of baleen measuring approximately 0.3 m in length held together by torn flesh.                                                                                                                                                                                                                                                                                                                                                       |
| 1999095          | 7/28/1999  | ~97 km south of<br>Juneau, Stephens<br>Passage | definite strike                                        | humpback whale<br>[age class & sex unknown] | dead            | cruise ship<br>[243 m]          | 19 kn                                | While transiting at 19 kn, a slight vibration was felt by the chief engineer, but not by the crew on the bridge. Soon after, a passenger on the bow reported a dead whale draped over the ship's bulbous bow at the water line. A photograph confirmed the species was a humpback whale. The whale remained pinned to the bow until the ship slowed down, at which time it slipped off and sank.                                                                                                                                                                                                                                 |
| 1999133          | 9/6/1999   | Sisters Island,<br>Icy Strait                  | definite strike                                        | humpback whale<br>[age class & sex unknown] | unknown         | private recreational<br>[9 m]   | 1-11 kn (sailboat under power)       | Whale surfaced underneath the sailboat and brought its tail down on the forward deck, damaging hardware and putting some spider cracks in the fiberglass. The boat started to take on water but did not sink.                                                                                                                                                                                                                                                                                                                                                                                                                    |
| 1999124          | 10/31/1999 | Metlakatla                                     | definite strike                                        | humpback whale<br>[age class & sex unknown] | external injury | private recreational<br>[6 m]   | unknown                              | They saw some whales offshore and slowed down, but continued transiting trying to get out of their path, when the collision occurred. Three people were injured; one lost consciousness and knocked out his front teeth when he struck the dash, the other two passengers were treated for minor injuries. Whale skin was found on the vessel's bow.                                                                                                                                                                                                                                                                             |
| 2000106          | 8/16/2000  | Uyak Bay, Kodiak                               | definite strike                                        | fin whale<br>[age class & sex unknown]      | unknown         | US Coast Guard cutter<br>[34 m] | 17 kn                                | The whale appeared to be traveling alone and was not sighted before it unexpectedly breached within a pod of Dall's porpoise ~14 m ahead of the vessel. Engines were brought astern immediately and then to all stop and there was "minor contact" with the whale. The vessel, which was not damaged, remained on scene for ~30 mins and observed the whale proceeding away with no signs of injury or distress.                                                                                                                                                                                                                 |
| 2001012          | 6/19/2001  | near Lord Rocks,<br>Dixon Entrance             | definite strike                                        | humpback whale<br>[age class & sex unknown] | unknown         | US Coast Guard cutter<br>[34 m] | 12 kn                                | Vessel was transiting in good conditions (wind speed 12 kn, visibility 7 nm, swell 0.6 m, seas 0.3 m) when a whale surfaced ~3 m ahead. They immediately backed down and then came to all stop as the whale dove under the vessel. After a few mins the whale was resighted, then it dove again. Crew in forward berthing reported hearing a thump just prior to the cutter backing down. No unusual vibrations were detected when testing propulsion and they did not see any blood in the water. No damage to the vessel was evident above the waterline. They had not seen any whales in the vicinity prior to the collision. |

| NMFS<br>Record #   | Date        | Location                                                                                | Confidence<br>category                                 | Species struck<br>[age class, sex]              | Fate of whale | Vessel type<br>[length]             | Vessel speed at<br>time of collision                                                                                  | Description of event                                                                                                                                                                                                                                                                                                                                                                                                                                                                                                                                                                      |
|--------------------|-------------|-----------------------------------------------------------------------------------------|--------------------------------------------------------|-------------------------------------------------|---------------|-------------------------------------|-----------------------------------------------------------------------------------------------------------------------|-------------------------------------------------------------------------------------------------------------------------------------------------------------------------------------------------------------------------------------------------------------------------------------------------------------------------------------------------------------------------------------------------------------------------------------------------------------------------------------------------------------------------------------------------------------------------------------------|
| none               | July 2001   | Pleasant Island,<br>Icy Strait                                                          | definite strike                                        | humpback whale<br>[age class & sex unknown]     | unknown       | commercial recreational<br>[14 m]   | unknown                                                                                                               | Captain reported that while whale watching, a humpback whale surfaced underneath the boat, rocking it. No obvious injury to whale and no damage to boat. Exact date unknown.                                                                                                                                                                                                                                                                                                                                                                                                              |
| 2001038            | 7/13/2001   | entrance to Glacier Bay                                                                 | definite strike                                        | humpback whale<br>[13.9 m adult, female]        | dead          | cruise ship<br>[232 m]              | 14 kn and accelerating                                                                                                | Two humpback whales were seen traveling towards the ship's bow for at least two surfacings prior to the collision. The ship's naturalist reported seeing both whales surface very close to the bow and one whale appeared to dive away, but suspected that the other whale may have been struck. Three days later, an adult humpback whale carcass floated to the surface in the same area. The whale was identified as SE Alaska ID #68. A necropsy revealed skull fractures and ante mortem hemorrhage.                                                                                 |
| 2001052            | August 2001 | NNE of Coronation<br>Island, between lower<br>Chatham Strait and<br>lower Sumner Strait | definite strike                                        | unidentified whale<br>[age class & sex unknown] | unknown       | cruise ship<br>[293 m]              | unknown                                                                                                               | Cruise ship pilot reported collision with one whale, exact date unknown.                                                                                                                                                                                                                                                                                                                                                                                                                                                                                                                  |
| 2001061            | 9/18/2001   | Port of Anchorage                                                                       | definite strike                                        | humpback whale<br>[age class & sex unknown]     | dead          | cargo<br>[216 m]                    | unkown but average cruising<br>speed 18-19 kn (12 kn when in<br>Cook Inlet)                                           | Carcass was discovered on a container ship's bulbous bow as it docked. It is unknown where the collision occurred. The ship travels the "typical" offshore shipping route between Seattle, WA and Anchorage, AK. Average transit speed is 18-19 kn but 12 kn in Cook Inlet. Carcass was removed and floated away with no necropsy.                                                                                                                                                                                                                                                        |
| AK2002-<br>1000124 | 3/1/2002    | Pasagshak Beach,<br>Kodiak                                                              | probable strike                                        | Cuvier's beaked whale<br>[5.1 m subadult, male] | dead          | unknown                             | unknown                                                                                                               | Carcass was found beach-cast. Necropsy found a large gash on the whale's side and a cut behind one of the pectoral fins.                                                                                                                                                                                                                                                                                                                                                                                                                                                                  |
| 2002temp69         | 6/22/2002   | Fern Harbor,<br>Cross Sound                                                             | definite strike                                        | humpback whale<br>[age class & sex unknown]     | unknown       | commercial recreational<br>[19 m]   | underway, then shifted engine<br>into neutral when whales<br>surfaced ahead, coasting<br>forward at time of collision | While proceeding to anchorage, two whales suddenly surfaced ~46 m ahead of the vessel. Captain shifted to neutral and the boat was coasting ahead when they felt a bump and a shudder. Immediately, a whale surfaced parallel to and possibly touching the port side of the vessel with its head towards the bow. The whale then "rolled under" and reappeared with the other whale off the stern. The whales continued on their way, moving away from the boat and swimming closely together. The whale's behavior gave no indication of distress and there was no damage to the vessel. |
| none               | 6/30/2002   | Gilbert Peninsula,<br>Glacier Bay                                                       | definite strike<br>(whale struck<br>stationary vessel) | humpback whale<br>[age class & sex unknown]     | unknown       | non-motorized recreational<br>[6 m] | drifting                                                                                                              | Paddler in single sea kayak stopped to photograph whales ~37-46 m ahead. A whale surfaced underneath the kayak and capsized it.                                                                                                                                                                                                                                                                                                                                                                                                                                                           |

| NMFS Record # | Date      | Location                                   | Confidence category                              | Species struck [age class, sex]                           | Fate of whale | Vessel type [length]                     | Vessel speed at time of collision          | Description of event                                                                                                                                                                                                                                                                                                                                                                                                                                                                                                                    |
|---------------|-----------|--------------------------------------------|--------------------------------------------------|-----------------------------------------------------------|---------------|------------------------------------------|--------------------------------------------|-----------------------------------------------------------------------------------------------------------------------------------------------------------------------------------------------------------------------------------------------------------------------------------------------------------------------------------------------------------------------------------------------------------------------------------------------------------------------------------------------------------------------------------------|
| none          | 9/5/2002  | Bartlett Cove, Glacier Bay                 | definite strike (whale struck stationary vessel) | humpback whale [age class & sex unknown]                  | unknown       | commercial recreational [20 m]           | at anchor                                  | Whale bumped vessel's hull while the vessel was at anchor. The whale was seen lunge feeding next to the boat several times after the collision. The collision was hard enough that the captain was concerned that the fiberglass hull had been damaged. He dove to inspect the hull but found no damage.                                                                                                                                                                                                                                |
| Temp43        | 9/24/2002 | Knik Arm, Cook Inlet                       | possible strike                                  | beluga whale [age class & sex unknown]                    | dead          | unknown                                  | unknown                                    | An employee of Cook Inlet Tug & Barge Company observed a dead beluga floating by, dorsal side up, ~8-9 m from where he stood. He reported 3-4 propeller cuts on the animal's back. He did not think the slashes were from a killer whale but could not be certain.                                                                                                                                                                                                                                                                      |
| 2003022       | 5/15/2003 | Point Manby, near mouth of Yakutat Bay     | definite strike                                  | humpback whale [14.3 m adult, female]                     | dead          | unknown                                  | unknown                                    | Necropsy of beach-cast whale found that the skull was shattered, severed from the spine and displaced to one side. There was also hemorrhaging along the whale's right side.                                                                                                                                                                                                                                                                                                                                                            |
| none          | June 2003 | off Shelikof Bay, near Sitka               | definite strike (whale struck stationary vessel) | humpback whale [age class & sex unknown]                  | unknown       | commercial recreational [length unknown] | at anchor                                  | Captain reported that the whale charged and rammed his boat while it was at anchor. He started his engine and ran with his anchor out to get away. Exact date unknown.                                                                                                                                                                                                                                                                                                                                                                  |
| none          | 7/9/2003  | entering Glacier Bay from Icy Strait       | definite strike                                  | humpback whale [age class & sex unknown]                  | unknown       | private recreational [7 m]               | ~2-3 kn, then in reverse at time of impact | Vessel operator saw several whales off his port side in the distance. He slowed down and at that moment a whale surfaced immediately to the starboard side of the boat. He put the engine into reverse as the whale's tail made contact with the side of the vessel. The whale swam away from the boat and then circled and came straight back towards the boat at a fast pace. The whale appeared to be charging the boat so the operator immediately turned and departed the area.                                                    |
| 2003088       | 7/26/2003 | Auke Bay, Juneau                           | definite strike                                  | probable humpback whale [age class & sex unknown]         | unknown       | private recreational [6 m]               | unknown                                    | Whale surfaced under skiff, knocking a passenger into the water. The person was medevacked but the extent of their injuries is unknown.                                                                                                                                                                                                                                                                                                                                                                                                 |
| 2003094       | 8/2/2003  | "way west" of Pribilof Islands, Bering Sea | definite strike                                  | unidentified large baleen whale [age class & sex unknown] | unknown       | US Coast Guard cutter [115 m]            | 13 kn                                      | Visibility was ~0.8 km when two unidentified whales surfaced ~23 m off the bow, allowing no time for evasive measures. After "bumping" one of the whales it continued to swim down the port side without surfacing again. The cutter turned around and attempted to relocate the whale without success. During this time several whales were seen ~5 km away. In photos, they appeared to be fin whales, however the species that was struck was never confirmed. No evidence of the collision was found on the vessel or in the water. |

| NMFS<br>Record # | Date       | Location                                                   | Confidence<br>category                                 | Species struck<br>[age class, sex]                                    | Fate of whale                               | Vessel type<br>[length]                  | Vessel speed at<br>time of collision                                                                        | Description of event                                                                                                                                                                                                                                                                                                                                                                                                                                                                                                                                                                                                                                           |
|------------------|------------|------------------------------------------------------------|--------------------------------------------------------|-----------------------------------------------------------------------|---------------------------------------------|------------------------------------------|-------------------------------------------------------------------------------------------------------------|----------------------------------------------------------------------------------------------------------------------------------------------------------------------------------------------------------------------------------------------------------------------------------------------------------------------------------------------------------------------------------------------------------------------------------------------------------------------------------------------------------------------------------------------------------------------------------------------------------------------------------------------------------------|
| 2003111          | 8/15/2003  | between Point Retreat<br>and Funter Bay,<br>Chatham Strait | definite strike                                        | humpback whale<br>[age class & sex unknown]                           | unknown                                     | private recreational<br>[6 m]            | unknown                                                                                                     | Skiff was transiting on a misty, cloudy day with three people onboard when a whale suddenly surfaced directly ahead. The captain does not remember the collision, but he was thrown from the boat into the water and was initially unconscious. Another passenger suffered a broken back. The third passenger was not injured. They did not see the whale again.                                                                                                                                                                                                                                                                                               |
| 2003140          | 10/30/2003 | Sitka Sound                                                | definite strike                                        | humpback whale<br>[age class & sex unknown]                           | unknown                                     | research vessel<br>[7 m]                 | underway, then shifted engine into neutral when whale surfaced ahead, coasting forward at time of collision | Research vessel working near whales put outboard engine into neutral but the boat kept moving forward and bumped a whale's tail with the lower unit of the engine. The whale wheeze blew about five times and seemed agitated. No cuts were observed on the visible part of its body but it did not raise its flukes, which may have been injured.                                                                                                                                                                                                                                                                                                             |
| 2004064          | 5/27/2004  | Benjamin Island,<br>Lynn Canal                             | definite strike<br>(whale struck<br>stationary vessel) | humpback whale<br>[age class & sex unknown]                           | external injury                             | private recreational [length<br>unknown] | drifting                                                                                                    | Three people onboard were fishing and drifting with the engine off when a whale hit the boat in the stern and tipped it on its side. The boat did not take on any water but all three people were knocked down; none were injured. The whale then rolled on its side and disappeared beneath the water. They found a ~46-61 cm piece of blubber stuck in the chine of the boat.                                                                                                                                                                                                                                                                                |
| none             | 6/25/2004  | east of Inian Islands,<br>Icy Strait                       | definite strike                                        | humpback whale<br>[adult based on > 5 yr<br>sighting history, female] | minor injury<br>(known to have<br>survived) | research vessel<br>[7 m]                 | ~5 kn                                                                                                       | During attempt to obtain biopsy a whale in a group of five whales, the vessel inadvertently crossed paths with a submerged whale swimming under the boat. The whale apparently hit the outboard engine's propeller with the tip of its flukes. The engine stopped instantly and one propeller blade's tip was damaged and had skin fragments on it. Afterwards, researchers monitored all the whales and documented no change in their behavior or apparent injuries; the whales continued feeding together. They believe SE Alaska ID #539 was the struck whale and this whale has been sighted numerous times in subsequent years with no apparent injuries. |
| 2004043          | 7/30/2004  | Strawberry Island,<br>Glacier Bay                          | probable strike                                        | humpback whale<br>[8.5 m calf, male]                                  | dead                                        | unknown                                  | unknown                                                                                                     | Fresh carcass was found beach-cast. Two days later a necropsy found that the calf had blunt trauma with rib fractures on its right side. The whale was identified as the calf of SE Alaska ID #1432. This cow/calf pair had been documented nearby several times and a 13 knot vessel speed limit was in place in the area.                                                                                                                                                                                                                                                                                                                                    |



| NMFS<br>Record # | Date      | Location                                                      | Confidence<br>category | Species struck<br>[age class, sex]                    | Fate of whale | Vessel type<br>[length]           | Vessel speed at<br>time of collision | Description of event                                                                                                                                                                                                                                                                                                                                                                                                                                                                                                                                                                                                                                   |
|------------------|-----------|---------------------------------------------------------------|------------------------|-------------------------------------------------------|---------------|-----------------------------------|--------------------------------------|--------------------------------------------------------------------------------------------------------------------------------------------------------------------------------------------------------------------------------------------------------------------------------------------------------------------------------------------------------------------------------------------------------------------------------------------------------------------------------------------------------------------------------------------------------------------------------------------------------------------------------------------------------|
| 2004051          | 8/13/2004 | floating near Juneau,<br>then beached on SW<br>Douglas Island | definite strike        | humpback whale<br>[8.4 m calf, female]                | dead          | unknown                           | unknown                              | Carcass was first reported floating and then found beach-cast two days later. Necropsy revealed that the calf was in very good body condition but had a fractured scapula associated with a large area of muscle damage and subcutaneous hemorrhage. There were also two parallel full thickness lacerations (61 and 121 cm long) beginning 76 cm from the rostral tip of the mandible and extending nearly parallel to the throat grooves just to the left of midline. The cuts did not resemble typical propeller cuts but if they occurred ante mortem, they would have prevented normal feeding and might have resulted in significant blood loss. |
| 2005003          | 5/13/2005 | Kenai River                                                   | probable strike        | humpback whale<br>[8.2 m subadult, male]              | dead          | unknown                           | unknown                              | Carcass was found beach-cast. Necropsy revealed severe blunt trauma with cervical spinal cord and muscle and fascial hemorrhage. There was generalized organ congestion and hemorrhage in a section of skeletal muscle and no other major histologic lesions. The animal appeared to be nutritionally stressed with serous atrophy of fat in the deep dermis and other tissues.                                                                                                                                                                                                                                                                        |
| 2005089          | 5/30/2005 | George Inlet,<br>Ketchikan                                    | definite strike        | humpback whale<br>[age class & sex unknown]           | unknown       | commercial recreational<br>[15 m] | unknown                              | Captain saw whale surface in front of vessel but was unable to avoid hitting it. Impact was not hard, but did make the vessel rise slightly as though the vessel had brushed across the whale's back. Vessel stayed in the area after the strike but they did not see any blood or other sign of injury.                                                                                                                                                                                                                                                                                                                                               |
| 2005060          | 6/21/2005 | Kachemak Bay,<br>Homer                                        | definite strike        | unidentified large whale<br>[age class & sex unknown] | severe injury | commercial recreational<br>[9 m]  | unknown                              | Vessel was transiting when they saw a whale surface near the propeller. The whale "thumped" under the boat and they observed blood in the water. Only saw a dark tail, possibly a humpback whale, and then the whale swam away.                                                                                                                                                                                                                                                                                                                                                                                                                        |
| 2005102          | 7/2/2005  | between Green and<br>Knight Islands,<br>Prince William Sound  | definite strike        | unidentified large whale<br>[age class & sex unknown] | unknown       | private recreational<br>[8 m]     | 19 kn                                | Captain initially thought he had struck a submerged log, but witnesses said he struck a whale. Captain thinks the strike pulled the rubber boots off the drive. He shut down the engines, checked the engine compartment and found that the vessel was rapidly taking on water via the engine compartment. When the vessel sank he did not see any hull damage. Three stationary vessels witnessed the strike. They were watching a pod of whales feeding nearby when they saw a whale surface right under the vessel. The whale was seen swimming away after the collision.                                                                           |

| NMFS<br>Record # | Date       | Location                                                             | Confidence<br>category | Species struck<br>[age class, sex]          | Fate of whale | Vessel type<br>[length]           | Vessel speed at<br>time of collision                                                                | Description of event                                                                                                                                                                                                                                                                                                                                                                                                                                                                                                                                                      |
|------------------|------------|----------------------------------------------------------------------|------------------------|---------------------------------------------|---------------|-----------------------------------|-----------------------------------------------------------------------------------------------------|---------------------------------------------------------------------------------------------------------------------------------------------------------------------------------------------------------------------------------------------------------------------------------------------------------------------------------------------------------------------------------------------------------------------------------------------------------------------------------------------------------------------------------------------------------------------------|
| 2005084          | 7/7/2005   | Icy Strait,<br>Point Adolphus                                        | definite strike        | humpback whale<br>[age class & sex unknown] | unknown       | commercial recreational<br>[8 m]  | underway at unknown speed,<br>captain reduced speed and was<br>"barely moving" at time of<br>strike | Vessel was in transit when a whale surfaced directly ahead.<br>Captain immediately reduced speed and stopped the engine. The<br>whale's flukes were struck by the starboard bow and then it dove.<br>Captain reported that the impact was "not that hard because the<br>boat was barely moving." However, due to the abrupt stop, a<br>child was thrown from his mother's arms and a camera flew<br>across cabin. The vessel remained in the area until the whale<br>resurfaced several hundred meters away. The whale appeared to<br>be breathing and behaving normally. |
| 2005044          | 8/13/2005  | between Turnabout<br>Island and Kupreanof<br>Island, Frederick Sound | definite strike        | humpback whale<br>[age class & sex unknown] | unknown       | unknown<br>[9 m]                  | 25 kn                                                                                               | Captain reported that he had struck a whale. He thought he had<br>hit it with the side of his boat, not the propeller, but he could not<br>be sure. He saw the whale dive after the collision but he did not<br>stay around to see it surface again. There was no damage to the<br>vessel.                                                                                                                                                                                                                                                                                |
| 2005081          | 9/8/2005   | Stephens Passage                                                     | possible strike        | humpback whale<br>[age class & sex unknown] | unknown       | commercial recreational<br>[41 m] | 10 kn                                                                                               | Reported by captain as a possible collision. A whale breached<br>ahead of the vessel, effectively distracting the captain.<br>Meanwhile, another whale surfaced right off the bow and the<br>captain disengaged the engine to neutral. Passengers in the<br>forward lounge felt a pressure wave hit the hull and the whale<br>was next seen spyhopping ~5 m from the bow.                                                                                                                                                                                                 |
| 2005080          | 9/14/2005  | near Brothers Islands,<br>Frederick Sound                            | definite strike        | humpback whale<br>[age class & sex unknown] | unknown       | cruise ship<br>[266 m]            | 20 kn                                                                                               | Cruise ship pilot reported that two humpback whales passed<br>across the ship's bow from port to starboard. They felt a glancing<br>blow on the port side and a vibration in the hull was reported.<br>The whales surfaced a short time later ~180 m away. No blood<br>was seen in the water.                                                                                                                                                                                                                                                                             |
| 2005079          | 10/15/2005 | Peril Strait                                                         | probable strike        | humpback whale<br>[8.6 m calf, male]        | dead          | unknown                           | unknown                                                                                             | Carcass was first reported floating, then beach-cast. Necropsy<br>concluded probable cause of death was severe blunt trauma with<br>mandibular and cervical muscle damage. There was a large area<br>of moderate hemorrhage in the muscle and fascial planes of the<br>lower right jaw, severely necrotic muscle in the cervical region<br>and multiple-focal areas (10 cm) of bruising along the left side,<br>cervical area and upper thorax. No obvious skeletal fractures<br>were found but the necropsy was limited by a < 4 hr tide window.                         |

| NMFS<br>Record # | Date      | Location                                         | Confidence<br>category | Species struck<br>[age class, sex]          | Fate of whale | Vessel type<br>[length]                     | Vessel speed at<br>time of collision                | Description of event                                                                                                                                                                                                                                                                                                                                                                                                                                                                                                                                                                                                                                     |
|------------------|-----------|--------------------------------------------------|------------------------|---------------------------------------------|---------------|---------------------------------------------|-----------------------------------------------------|----------------------------------------------------------------------------------------------------------------------------------------------------------------------------------------------------------------------------------------------------------------------------------------------------------------------------------------------------------------------------------------------------------------------------------------------------------------------------------------------------------------------------------------------------------------------------------------------------------------------------------------------------------|
| 2006030          | 6/10/2006 | off Barlow Island,<br>Saginaw Channel,<br>Juneau | definite strike        | humpback whale<br>[age class & sex unknown] | unknown       | State ferry<br>[72 m]                       | 13-14 kn                                            | Approximately six whales were in the center of the channel with multiple whale watch vessels viewing them. The ferry transited down the opposite side of the channel from the other vessels. Suddenly a whale surfaced ~30 m ahead, crossing the ferry's bow. The ferry reduced speed but the mate and helmsman reported feeling a bump. They believe the whale's tail was hit. Another crew member went to the stern and saw three whales swimming normally ~0.8 km off the stern. A whale watch vessel nearby watched the three whales more closely and did not see any injured animals. No blood was seen in the water and the ferry was not damaged. |
| 2006076          | 8/15/2006 | North Pass, Juneau                               | definite strike        | humpback whale<br>[age class & sex unknown] | unknown       | commercial recreational<br>[13 m]           | idling, then engine in reverse<br>at time of impact | Captain drove commercial whale watch vessel into the path of three oncoming whales. One whale surfaced and was struck by the the vessel's bow. A passenger fell and suffered a minor head injury. The vessel was not damaged.                                                                                                                                                                                                                                                                                                                                                                                                                            |
| 2006140          | 8/19/2006 | Resurrection Bay,<br>Seward                      | definite strike        | fin whale<br>[13.2 m subadult, male]        | dead          | cruise ship<br>[294 m]                      | unknown                                             | Carcass was brought into port wrapped around the ship's bulbous bow. Collision occurred somewhere between Disenchantment Bay (near Yakutat) and Seward. Crew reported feeling no "bumps" during the voyage. Necropsy revealed ante mortem acute hemorrhage, multiple fractured bones (vertebrae, ribs, scapula, carpus) and rupture of the ventral body wall with evisceration and loss of the stomach, liver, spleen and small intestine.                                                                                                                                                                                                               |
| 2007041          | 6/28/2007 | Passage Canal,<br>en route to<br>Whittier Harbor | definite strike        | humpback whale<br>[age class & sex unknown] | unknown       | private recreational<br>[8 m]               | 28 kn                                               | A jet boat was transiting in 0.6-0.9 m choppy seas, rain and poor visibility when a whale suddenly surfaced 10-15 m directly ahead, crossing the bow. The captain turned suddenly in an attempt to avoid a collision but there was little time to react and the whale was struck. The collision launched the boat into the air and dented the hull but no one onboard was injured. They did not see the whale again.                                                                                                                                                                                                                                     |
| 2007040          | 6/10/2007 | Whale Bay,<br>Prince William Sound               | definite strike        | humpback whale<br>[age class & sex unknown] | severe injury | commercial recreational<br>[length unknown] | unknown                                             | Vessel operator reported striking a whale with the engine's propeller and the whale was observed bleeding.                                                                                                                                                                                                                                                                                                                                                                                                                                                                                                                                               |

| NMFS<br>Record # | Date      | Location                                     | Confidence<br>category | Species struck<br>[age class, sex]          | Fate of whale | Vessel type<br>[length]                  | Vessel speed at<br>time of collision | Description of event                                                                                                                                                                                                                                                                                                                                                                                                                                                                                                                                                                                                                                                                                                                                                         |
|------------------|-----------|----------------------------------------------|------------------------|---------------------------------------------|---------------|------------------------------------------|--------------------------------------|------------------------------------------------------------------------------------------------------------------------------------------------------------------------------------------------------------------------------------------------------------------------------------------------------------------------------------------------------------------------------------------------------------------------------------------------------------------------------------------------------------------------------------------------------------------------------------------------------------------------------------------------------------------------------------------------------------------------------------------------------------------------------|
| 2007048          | June 2007 | Chamberlain Bay,<br>Prince William Sound     | definite strike        | humpback whale<br>[age class & sex unknown] | unknown       | private recreational<br>[length unknown] | ~23 kn                               | Vessel was transiting in good sea conditions when a whale surfaced 9 m off the bow. Captain put the engine in neutral and turned sharply in an attempt to avoid a collision. It appeared they were going to miss the whale as it began to dive, but then a second whale surfaced behind it and they struck this whale in the midde of its back. The collision launched the vessel into the air and when it landed abruptly, water sloshed over the stern and one passenger was thrown from her seat and fell hard to the deck, bruising her elbow. The main outboard engine was disabled so they used an auxiliary engine to beach the boat and inspect it for damage. The skeg was gone and the lower unit gear case had a very large crack/hole in it. Exact date unknown. |
| 2007046          | 7/1/2007  | ~3.2 km SE of Saint<br>Lazaria Island, Sitka | definite strike        | humpback whale<br>[age class & sex unknown] | unknown       | commercial recreational<br>[8 m]         | ~13 kn                               | Vessel was transiting in calm seas, 5 kn winds and good visibility. Captain had seen whales ~0.4 km away when suddenly a whale surfaced no more than 6 m ahead, crossing perpendicular to bow. He immediately put the engine in neutral and felt a thump under the boat. Passengers felt jarred but were uninjured. After the collision, a whale surfaced ~45 m from the vessel, breathed and submerged. Then two more whales surfaced ~180 m apart and 90-180 m from the vessel. The captain stayed for 10-15 mins and looked with binoculars for any signs of injuries on the whales. The whales dove and captain did not see any signs of distress or wounds.                                                                                                             |
| 2007061          | 7/4/2007  | Port Snettisham,<br>Stephens Passage         | definite strike        | humpback whale<br>[age class & sex unknown] | unknown       | private recreational<br>[8 m]            | 20 kn                                | A whale surfaced abruptly in front of the skiff in an area where other whales were seen feeding. The captain saw the whale but could not stop. The vessel skimmed/skipped over the back of the animal. The captain did not feel any impact and did not believe the animal was struck by the propeller. He stayed in the area and saw the whale resurface.                                                                                                                                                                                                                                                                                                                                                                                                                    |
| 2007068          | 7/8/2007  | outside Basket Bay,<br>Chatham Strait        | possible strike        | humpback whale<br>[13.0 m adult, male]      | dead          | unknown                                  | unknown                              | A whale with a grossly inflated tongue and deformed head was observed alive for three days before dying. A necropsy found that the whale was in excellent body condition except for massive emphysema and tongue inflation; focal acute trauma on left maxilla and cervical region; subcutaneous edema and hemorrhage, ventral midline, cervical and thoracic region. However, the cause of death could not be confirmed due to a limited necropsy. The skeleton was not examined for fractures. Suspected blow to chest/neck that caused a rupture of part of the respiratory tract with air exhaled into tissues of the tongue, causing it to inflate.                                                                                                                     |

| NMFS<br>Record # | Date      | Location                                                  | Confidence<br>category | Species struck<br>[age class, sex]                   | Fate of whale | Vessel type<br>[length]           | Vessel speed at<br>time of collision | Description of event                                                                                                                                                                                                                                                                                                                                                                                                                                                                                                                                                                                                                                                                                                                                                                                                    |
|------------------|-----------|-----------------------------------------------------------|------------------------|------------------------------------------------------|---------------|-----------------------------------|--------------------------------------|-------------------------------------------------------------------------------------------------------------------------------------------------------------------------------------------------------------------------------------------------------------------------------------------------------------------------------------------------------------------------------------------------------------------------------------------------------------------------------------------------------------------------------------------------------------------------------------------------------------------------------------------------------------------------------------------------------------------------------------------------------------------------------------------------------------------------|
| 2007126          | 7/27/2007 | Lamplugh Glacier,<br>Glacier Bay                          | possible strike        | humpback whale<br>[age class & sex unknown]          | unknown       | commercial recreational<br>[13 m] | 28 kn                                | The captain reported that he was transiting on plane when a whale surfaced unexpectedly off his starboard side. He immediately reduced the vessel's speed and made an evasive maneuver that was so abrupt that it threw him out of his seat and jolted others onboard. The captain did not think he had struck the whale and he subsequently observed the whale surface at least three more times. However, at least one passenger reported that the whale had been struck. Seven days later, an adult female whale that was known to frequent this area (SE Alaska ID #1018) was observed with an unusual skin abrasion on her left side. The injury consisted of a swath of abraded skin and appeared to be superficial and not life threatening. However, it was not possible to confirm that #1018 had been struck. |
| 2007119          | 8/14/2007 | ~8 km off Spasski<br>Island, Icy Strait                   | definite strike        | humpback whale<br>[age class & sex unknown]          | unknown       | cargo<br>[10 m]                   | 17 kn                                | A heavily loaded landing craft was transiting when the vessel shuddered and the captain was forced to turn off the engine. A whale came up behind the vessel after the collision.                                                                                                                                                                                                                                                                                                                                                                                                                                                                                                                                                                                                                                       |
| 2008002          | 2/10/2008 | Eastern Channel,<br>Sitka                                 | definite strike        | humpback whale<br>[age class & sex unknown]          | unknown       | private recreational<br>[9 m]     | 19 kn                                | Vessel was operating at dusk when it struck a whale. The impact kicked up the starboard engine and a whale was seen breathing ~15 m behind the vessel. The whale was hit by the engine's lower unit.                                                                                                                                                                                                                                                                                                                                                                                                                                                                                                                                                                                                                    |
| 2008208          | 4/1/2008  | Trocadero Bay,<br>Bucareli Bay,<br>Prince of Wales Island | definite strike        | humpback whale<br>[age class & sex unknown]          | unknown       | private recreational<br>[10 m]    | unknown                              | This is the first of two reports in 2008 (also see report #2008145) in which the same operator intentionally rammed whales. In this case, he "jumped" the vessel over the top of a whale. The vessel's speed during the collision was unknown, but the vessel was capable of going at least 37 kn.                                                                                                                                                                                                                                                                                                                                                                                                                                                                                                                      |
| none             | 6/16/2008 | Point Adolphus,<br>Icy Strait                             | possible strike        | possible humpback whale<br>[age class & sex unknown] | unknown       | private recreational<br>[7 m]     | 30 kn                                | The vessel was taking on water and sinking and the captain reported that he thought he had hit a whale or perhaps a sea lion. He "saw something come out of the water". The boat was beached and the outdrive was damaged but no whale tissue was found on the propeller. NPS whale biologists searched the area for several hours and found no injured whales.                                                                                                                                                                                                                                                                                                                                                                                                                                                         |

| NMFS<br>Record # | Date      | Location                                                     | Confidence<br>category | Species struck<br>[age class, sex]                                            | Fate of whale                                      | Vessel type<br>[length]           | Vessel speed at<br>time of collision | Description of event                                                                                                                                                                                                                                                                                                                                                                                                                                                                                                                                                                                                                                                                                                                                                                                                                                                                                                                                                       |
|------------------|-----------|--------------------------------------------------------------|------------------------|-------------------------------------------------------------------------------|----------------------------------------------------|-----------------------------------|--------------------------------------|----------------------------------------------------------------------------------------------------------------------------------------------------------------------------------------------------------------------------------------------------------------------------------------------------------------------------------------------------------------------------------------------------------------------------------------------------------------------------------------------------------------------------------------------------------------------------------------------------------------------------------------------------------------------------------------------------------------------------------------------------------------------------------------------------------------------------------------------------------------------------------------------------------------------------------------------------------------------------|
| 2008031          | 6/23/2008 | Auke Bay, Juneau                                             | definite strike        | humpback whale<br>[adult based on > 5 yr<br>sighting history, sex<br>unknown] | no visible injuries<br>(known to have<br>survived) | commercial recreational<br>[10 m] | ~25 kn                               | Tour boat was transiting when it hit a whale right after it surfaced. The whale was struck on its dorsal side and they did not see the whale again. The captain did not think the propellers had struck the whale because this would have kicked up the engines. The speed of the vessel decreased ~3-4 kn after the strike. The captain reported that the struck whale was a well-known individual to the local tour boat captains. Later that day, NOAA Protected Resources searched for an injured whale and found none in distress. They sighted the whale that was allegedly hit (it had a distinct dorsal fin and was known as "no fluke Charlie") and it was lunge feeding and behaving normally with no obvious injuries. This whale has been seen repeatedly in subsequent years with no visible injuries.                                                                                                                                                        |
| 2008089          | 7/23/2008 | near Fort Abercrombie<br>State Park, Kodiak                  | definite strike        | humpback whale<br>[age class & sex unknown]                                   | unknown                                            | private recreational<br>[8 m]     | 26 kn                                | Captain reported that the water was flat calm and he saw no sign of whales in the area. He was transiting when suddenly he hit something very hard. The impact almost tipped the boat over with force "almost as hard as if I'd hit a rock." Immediately a whale surfaced behind the vessel and began to breach. The whale continued to breach for almost 20 mins. There was no damage to the vessel.                                                                                                                                                                                                                                                                                                                                                                                                                                                                                                                                                                      |
| 2008191          | 7/26/2008 | Point Adolphus,<br>Icy Strait                                | definite strike        | humpback whale<br>[calf (J. Neilson, pers. obs.),<br>sex unknown]             | minor injury<br>(known to have<br>survived)        | commercial fishing<br>[18 m]      | 10 kn                                | Vessel was transiting at 10 kn when the bow struck a whale that the captain had not seen beforehand. He put the engine into neutral and turned hard to port but the collision lifted the bow several feet out of the water. He observed the whale surface ~30 m away and saw no apparent signs of injury or blood in the water. About 10 whales surfaced right after the collision. Three days later SE Alaska ID #1907's calf was documented with fresh injuries at Point Adolphus. The calf had a swath of skin missing that extended along the dorsal side of its right flank from the dorsal fin to the caudal peduncle exposing an underlying layer of red bloody tissue. In addition, the trailing edge of the dorsal fin was damaged with some tissue missing. The injuries appeared non-life threatening and the calf's behavior was normal. Whale #1907 and her calf were documented alive and behaving normally near Juneau on 10/8/08 (75 days post-collision). |
| 2008093          | 7/27/2008 | North Pass between<br>Lincoln and Shelter<br>Islands, Juneau | definite strike        | humpback whale<br>[age class & sex unknown]                                   | unknown                                            | private recreational<br>[7 m]     | 15 kn                                | Vessel was transiting when it hit a whale. One of the three passengers was thrown into the water. A single whale surfaced twice ~6 m off the stern and they did not see any injuries. All three blades on the vessel's propeller were bent and the fiberglass outboard engine transom mount was damaged. NOAA Fisheries conducted a vessel patrol in the area and found no distressed or injured whales.                                                                                                                                                                                                                                                                                                                                                                                                                                                                                                                                                                   |

| NMFS<br>Record # | Date      | Location                                     | Confidence<br>category                                 | Species struck<br>[age class, sex]                                                                                | Fate of whale | Vessel type<br>[length]                  | Vessel speed at<br>time of collision                 | Description of event                                                                                                                                                                                                                                                                                                                                                                                                                                                                                                                                                                                                           |
|------------------|-----------|----------------------------------------------|--------------------------------------------------------|-------------------------------------------------------------------------------------------------------------------|---------------|------------------------------------------|------------------------------------------------------|--------------------------------------------------------------------------------------------------------------------------------------------------------------------------------------------------------------------------------------------------------------------------------------------------------------------------------------------------------------------------------------------------------------------------------------------------------------------------------------------------------------------------------------------------------------------------------------------------------------------------------|
| 2008094          | 7/30/2008 | North of Long Island,<br>Chiniak Bay, Kodiak | definite strike                                        | humpback whale<br>[age class & sex unknown]                                                                       | unknown       | private recreational<br>[length unknown] | 15 kn                                                | Captain reported that a whale surfaced unexpectedly in front of his vessel on a sunny day in calm seas. He put the engine in reverse but the bow struck the whale, likely between the dorsal fin and flukes, and then the whale dove. Passengers were knocked off their feet and the bow railing and some vessel fittings were damaged. The whale surfaced again ~4 mins after the collision.                                                                                                                                                                                                                                  |
| 2008138          | 9/7/2008  | Resurrection Bay,<br>Seward                  | definite strike                                        | humpback whale<br>[age class & sex unknown]                                                                       | severe injury | commercial recreational<br>[27 m]        | moving slowly forward along<br>shore just above idle | Visibility was poor and the captain and crew were unaware that a whale was in the area. They heard a loud thump at the aft end of the vessel and the vessel shuddered. A whale surfaced behind the vessel 30 sec to 1 min after the collision. A crew member saw ~1 m square patches of blood in the water every time the animal surfaced to breathe but could not see where it was injured. Another crew member reported that the whale surfaced under the vessel just forward of the propellers and presumably was hit by them as the boat moved forward. Passengers felt and heard the whale hit the underside of the boat. |
| 2008145          | 9/12/2008 | near Breezy Bay,<br>Craig                    | definite strike                                        | humpback whale<br>[age class & sex unknown]                                                                       | unknown       | private recreational<br>[10 m]           | ~35 kn                                               | This is the second of two reports in 2008 (also see report #2008208) in which the same operator intentionally rammed whales. In this case, he spotted whales, altered course towards them and struck what appeared to be a cow/calf pair. It looked like the larger whale (possibly a cow) surfaced between the vessel and the smaller whale (possibly a calf), causing the boat to be launched into the air and sustaining unknown injuries to the crew members.                                                                                                                                                              |
| 2009022          | 6/1/2009  | Valdez Arm,<br>Prince William Sound          | definite strike                                        | unidentified large baleen whale dead<br>(appeared to be a fin, blue or<br>sei whale)<br>[age class & sex unknown] |               | cargo<br>[254 m]                         | unknown                                              | Carcass was found on the bulbous bow of an oil tanker as it came into port. NMFS attempted to organize a necropsy but meanwhile the whale became a Homeland Security issue so the carcass was towed out of port and sunk. No samples were collected and the species was never confirmed, however in photos it appeared to be a fin, blue or sei whale.                                                                                                                                                                                                                                                                         |
| 2009040          | 6/5/2009  | Icy Passage,<br>Icy Strait                   | definite strike<br>(whale struck<br>stationary vessel) | humpback whale<br>[age class & sex unknown]                                                                       | unknown       | private recreational<br>[6 m]            | at anchor                                            | A rigid hull Zodiac with five people onboard was anchored while sport fishing when they saw a whale blow twice in the distance. A few mins later the whale suddenly surfaced directly underneath the boat and lifted it ~1 m out of the water with its back. One child fell down but no one was injured. The engine was off when the collision occurred. As the whale dove, it appeared to become entangled in their fishing lines. The whale surfaced again ~180 m away and dove. They could not see any entangling gear or injuries on the whale.                                                                            |

| NMFS<br>Record # | Date              | Location                                | Confidence<br>category | Species struck<br>[age class, sex]                 | Fate of whale   | Vessel type<br>[length]                     | Vessel speed at<br>time of collision | Description of event                                                                                                                                                                                                                                                                                                                                                                                                                                                                                                                                                                                                                                                                                                                                                                                                         |
|------------------|-------------------|-----------------------------------------|------------------------|----------------------------------------------------|-----------------|---------------------------------------------|--------------------------------------|------------------------------------------------------------------------------------------------------------------------------------------------------------------------------------------------------------------------------------------------------------------------------------------------------------------------------------------------------------------------------------------------------------------------------------------------------------------------------------------------------------------------------------------------------------------------------------------------------------------------------------------------------------------------------------------------------------------------------------------------------------------------------------------------------------------------------|
| 2009170          | 7/3/2009          | Inian Islands,<br>Cross Sound           | definite strike        | humpback whale<br>[age class & sex unknown]        | external injury | commercial fishing<br>[10 m]                | 7 kn                                 | Vessel was transiting in calm seas with good visibility. Captain heard a metallic thump and thought he had hit a log. He immediately shut down the engine to investigate. He heard a whale blowing behind the vessel and saw the whale swimming away. It came up a couple of times and breathed strong wheezy blows. He did not see any sign that the whale was injured, but did not know at the time that he had hit a whale. Later he went to the bow and found a "fistful" of whale tissue on the anchor chain, ~1.2 m above the waterline. He speculated that the whale came up right in front of the bow, then dove and rolled to get out of the way, hitting the bow with its tail or a pectoral fin as it rolled at the last second. There was a small gouge in the hull where the anchor tip had hit the fiberglass. |
| 2009046          | 7/5/2009          | just south of Glacier<br>Island, Valdez | definite strike        | humpback whale<br>[age class & sex unknown]        | unknown         | commercial recreational<br>[17 m]           | 19 kn                                | Vessel was transiting on a sunny day in "flat glass calm" seas. The three crew members had not seen any whales for 25 mins but were aware of two whales 3.2-4.8 km away. Suddenly, they heard a bump on the port side of the boat that sounded like they had struck a log so they stopped the boat to investigate, when they realized they had hit a whale. The whale was described as "not full size" but not a calf. In subsequent days, they saw no injured whales in the area.                                                                                                                                                                                                                                                                                                                                           |
| 2009080          | 8/4/2009          | Point Adolphus,<br>Icy Strait           | possible strike        | likely humpback whale<br>[age class & sex unknown] | unknown         | private recreational<br>[5 m]               | ~30 kn                               | Four passengers were transiting in an open skiff going "full throttle" when they hit something that launched them into the air. Witnesses said the boat was launched ~1 m into the air. All of the passengers were thrown by the collision but no one ended up in the water. One passenger had minor injuries (possible bruised ribs). Given the high density of whales in the area, it is very likely that they hit a whale. There was no damage to the vessel and no injured whales were observed or reported in the area following the incident.                                                                                                                                                                                                                                                                          |
| 2009098          | 8/9/2009          | Angoon                                  | definite strike        | humpback whale<br>[age class & sex unknown]        | unknown         | commercial recreational<br>[length unknown] | unknown                              | Captain reported that he did not see any whales in the vicinity when suddenly a whale surfaced underneath the vessel. After checking on his passengers and the vessel, he realized he had struck a whale. They saw the whale briefing after the collision and saw no apparent injuries or unusual behavior.                                                                                                                                                                                                                                                                                                                                                                                                                                                                                                                  |
| 2009143          | September<br>2009 | Icy Strait/Cross Sound                  | definite strike        | likely humpback whale<br>[age class & sex unknown] | unknown         | commercial recreational<br>[9 m]            | ≥ 12 kn                              | Vessel hit a whale while traveling at a "high rate of speed". Captain did not see the whale in advance and the vessel was launched into the air. There was a dent in the vessel from the collision. Exact date and location are unknown.                                                                                                                                                                                                                                                                                                                                                                                                                                                                                                                                                                                     |



| NMFS Record # | Date      | Location                                    | Confidence category | Species struck [age class, sex]                                 | Fate of whale | Vessel type [length]           | Vessel speed at time of collision | Description of event                                                                                                                                                                                                                                                                                                                                                                                                                                                                                                                                                                                                                                                                                                                          |
|---------------|-----------|---------------------------------------------|---------------------|-----------------------------------------------------------------|---------------|--------------------------------|-----------------------------------|-----------------------------------------------------------------------------------------------------------------------------------------------------------------------------------------------------------------------------------------------------------------------------------------------------------------------------------------------------------------------------------------------------------------------------------------------------------------------------------------------------------------------------------------------------------------------------------------------------------------------------------------------------------------------------------------------------------------------------------------------|
| none          | 5/7/2010  | Inian Islands, Cross Sound                  | possible strike     | humpback whale [age class & sex unknown]                        | unknown       | commercial recreational [24 m] | 4 kn or less                      | Vessel was traveling slowly viewing sea lions when a single whale surfaced directly in front of the vessel, crossing the bow. NPS rangers onboard thought the whale was struck and reported feeling the vessel shudder. Captain and crew did not believe the whale was struck and attributed the shudder to throttling back the engine. No injured whales were observed or reported in the area.                                                                                                                                                                                                                                                                                                                                              |
| 2010017       | 5/22/2010 | Eldridge Rock, Lynn Canal                   | definite strike     | humpback whale [age class & sex unknown]                        | unknown       | commercial recreational [24 m] | 24 kn                             | Vessel was in transit when they heard and felt a bump and then a whale surfaced in the backwash of the boat. They stayed for 10 mins and watched the whale surface twice.                                                                                                                                                                                                                                                                                                                                                                                                                                                                                                                                                                     |
| 2010021       | 5/26/2010 | off Shelikof Bay, near Sitka                | possible strike     | humpback whale [adult based on > 5 yr sighting history, female] | dead          | unknown                        | unknown                           | Carcass was found floating and identified as SE Alaska ID #952. The carcass was not towed to shore for a necropsy and floated away, therefore the cause of this whale’s death remains unknown. However, she was seen feeding nearby the day before she was found dead, indicating that her death was very sudden. Photos of the carcass revealed a possible large skin abrasion or other abnormality.                                                                                                                                                                                                                                                                                                                                         |
| 2010044       | 6/9/2010  | Point Retreat, Juneau                       | definite strike     | humpback whale [age class & sex unknown]                        | unknown       | commercial recreational [24 m] | 14 kn                             | Vessel was transiting at 24 kn when the captain saw a whale surface. He immediately put the engines in reverse to try to avoid the whale. He estimated the vessel's speed to be 14 kn at the moment of impact.                                                                                                                                                                                                                                                                                                                                                                                                                                                                                                                                |
| 2010102       | 7/3/2010  | Belikovsky Bay, King Cove, Aleutian Islands | definite strike     | humpback whale [12.9 m adult, female]                           | dead          | unknown                        | unknown                           | Carcass was first reported floating, then beach-cast. Necropsy concluded the animal was in good body condition but there were multiple fractures at the base of the skull and both tympanic bulla were separated from basilar fragments of occipital bone. Severe autolysis and green discoloration was seen in muscles and fascia along right shoulder, neck and right abdominal wall. Muscles around right base of skull appeared more severely autolytic and discolored than on left side but fragmented basilar bones were seen bilaterally.                                                                                                                                                                                              |
| 2010089       | 7/28/2010 | Tracy Arm, south of Juneau                  | definite strike     | humpback whale [13.1 m adult, female]                           | dead          | cruise ship [288 m]            | unknown                           | Carcass was first observed pinned to the bow of the ship. The ship had noted the necessity to increase power during the night (~1 AM) to maintain cruising speed while in Chatham Strait. Necropsy found amputation of mid right pectoral flipper; acute degenerative myopathy in several muscle tissues; possible hemorrhage in the right ventral muscle; a full thickness avulsion of inframandibular tissue and tongue; and elevated saxitoxin levels. The report concluded that the whale may have been struck initially by a different large vessel, shearing off the pectoral fin and causing debility and/or death, followed by possible predation by killer whales and eventual post mortem entrapment on the bow of the cruise ship. |

| NMFS<br>Record # | Date      | Location                                           | Confidence<br>category                                 | Species struck<br>[age class, sex]          | Fate of whale | Vessel type<br>[length]           | Vessel speed at<br>time of collision | Description of event                                                                                                                                                                                                                                                                                                                                                                                                                                                                                                                                                                                                                                                                                                                           |
|------------------|-----------|----------------------------------------------------|--------------------------------------------------------|---------------------------------------------|---------------|-----------------------------------|--------------------------------------|------------------------------------------------------------------------------------------------------------------------------------------------------------------------------------------------------------------------------------------------------------------------------------------------------------------------------------------------------------------------------------------------------------------------------------------------------------------------------------------------------------------------------------------------------------------------------------------------------------------------------------------------------------------------------------------------------------------------------------------------|
| 2010147          | 8/18/2010 | Tenakee Inlet                                      | probable strike                                        | humpback whale<br>[9.6 m subadult, male]    | dead          | unknown                           | unknown                              | Carcas was found floating and then towed to shore. Necropsy concluded whale had died from respiratory insufficiency due to diaphragmatic hernia/thoracic hemorrhage as a result of high impact blunt trauma. Necropsy was limited and the skeleton was not examined for fractures.                                                                                                                                                                                                                                                                                                                                                                                                                                                             |
| 2010170          | 8/29/2010 | Uski Island,<br>Kodiak                             | definite strike                                        | fin whale<br>[14.0 m subadult, female]      | dead          | unknown                           | unknown                              | Carcass was found floating and then towed to shore. Necropsy found long ante mortem skull fracture.                                                                                                                                                                                                                                                                                                                                                                                                                                                                                                                                                                                                                                            |
| 2010172          | 9/1/2010  | near Hoonah                                        | definite strike                                        | humpback whale<br>[age class & sex unknown] | unknown       | commercial recreational<br>[24 m] | ~10 kn                               | Vessel was transiting towards a group of whales in the distance when a whale surfaced directly ahead and was struck by the starboard keel. The crew reported that they felt the strike occur mid-ship. The captain immediately stopped the engine and stood-by to evaluate the whale's condition. The whale was monitored for several dive cycles (~20 mins). No blood was observed in the water and the whale's behavior appeared normal.                                                                                                                                                                                                                                                                                                     |
| 2011050          | 6/28/2011 | across from Warm<br>Springs Bay,<br>Chatham Strait | definite strike                                        | humpback whale<br>[age class & sex unknown] | unknown       | private recreational<br>[15 m]    | 7-8 kn                               | Conditions were calm and rainy when the vessel unexpectedly struck a whale. They had not seen any whales nearby. The collision felt like "hitting a rock" and stopped the vessel dead in the water. The captain immediately put the engine in neutral. A whale surfaced not far from the bow and proceeded away from the vessel. There was no apparent damage to the vessel but they headed into port to inspect it for damage.                                                                                                                                                                                                                                                                                                                |
| 2011074          | 7/6/2011  | entrance to Port<br>Frederick,<br>Icy Strait       | definite strike<br>(whale struck<br>stationary vessel) | humpback whale<br>[age class & sex unknown] | unknown       | private recreational<br>[10 m]    | drifting with engine off             | Two people onboard a sailboat were drifting with the engine off watching a group of whales feeding nearby. Suddenly a solitary whale struck the boat hard from below on the port side. It was not clear if the whale was intending to breach or if it was surfacing to lunge feed or breathe. They reported that the vessel was lifted up to 1.2 m out of the water and pushed 3 m sideways, ripping the keel off of the boat. They saw the whale's pectoral fin "flutter" alongside the starboard side of the boat along the cockpit. They did not see any other whales breaching close by and the other group of whales that they had been watching were at a distance. The vessel sank within 2 mins, leaving both passengers in the water. |

| NMFS<br>Record # | Date      | Location                                                     | Confidence<br>category                                 | Species struck<br>[age class, sex]                                                       | Fate of whale   | Vessel type<br>[length]             | Vessel speed at<br>time of collision                                        | Description of event                                                                                                                                                                                                                                                                                                                                                                                                                                                                                                                                                                                                                                                                                                                                                                                                               |
|------------------|-----------|--------------------------------------------------------------|--------------------------------------------------------|------------------------------------------------------------------------------------------|-----------------|-------------------------------------|-----------------------------------------------------------------------------|------------------------------------------------------------------------------------------------------------------------------------------------------------------------------------------------------------------------------------------------------------------------------------------------------------------------------------------------------------------------------------------------------------------------------------------------------------------------------------------------------------------------------------------------------------------------------------------------------------------------------------------------------------------------------------------------------------------------------------------------------------------------------------------------------------------------------------|
| 2011117          | 8/8/2011  | off E side Kodiak<br>Island                                  | definite strike                                        | likely humpback whale<br>[age class & sex unknown]                                       | unknown         | private recreational<br>[11 m]      | 8 kn                                                                        | Vessel was transiting when a whale surfaced directly ahead. The captain took the engine out of gear but was unable to avoid hitting the whale. The whale was struck by the hull and resurfaced behind the vessel. He watched for a little while but did not see any signs of injury or distress. There was no damage to the vessel. Initially reported as a gray whale, but very likely was a humpback whale based on sightings in the area.                                                                                                                                                                                                                                                                                                                                                                                       |
| 2011142          | 8/31/2011 | between Willoughby<br>and Strawberry Islands,<br>Glacier Bay | definite strike                                        | humpback whale<br>[subadult (J. Neilson,<br>pers. obs.), sex unknown]                    | external injury | commercial recreational<br>[22 m]   | 13-14 kn, then put engine into<br>neutral and drifted forward<br>into whale | Vessel was transiting and did see the whale until it was directly in front of the vessel, still submerged under water. Captain immediately slowed down and felt a "thud" as the vessel drifted forward and struck the whale with the port bow. Passengers onboard the vessel reportedly did not feel the strike. Initially the whale stayed at the surface lifting its flukes just above the surface and "stress blowing". Eventually it started to dive for longer periods (7-10 mins). The vessel stood by until NPS whale biologists located the whale ~35 mins later. It appeared to be a small whale, likely 1-2 years old. There was an abrasion on its left flank below the dorsal fin that appeared to be the site of impact, but there was no visible blood or open wound. The whale traveled rapidly away from the area. |
| none             | 7/17/2011 | Bartlett Cove,<br>Glacier Bay                                | definite strike<br>(whale struck<br>stationary vessel) | humpback whale<br>[age class & sex unknown]                                              | unknown         | non-motorized recreational<br>[6 m] | drifting                                                                    | A whale came up under a double sea kayak and lifted it ~0.3 m out of the water, then dropped it suddenly. The whale appeared to be a calf and another whale, presumably the cow, surfaced nearby making audible wheeze blows.                                                                                                                                                                                                                                                                                                                                                                                                                                                                                                                                                                                                      |
| 2011160          | 9/7/2011  | ~2.4 km south of<br>Hump Island,<br>southern Lynn Canal      | definite strike                                        | humpback whale<br>[calf (commercial whale<br>watch captain, pers. obs.),<br>sex unknown] | external injury | commercial recreational<br>[24 m]   | ~23 kn                                                                      | Vessel was transiting when a calf surfaced right in front of bow. The captain felt the collision amidships on the hull. The calf resurfaced with a cow and remained breathing on the surface for ~3 mins before diving for ~5 mins, resurfacing, then diving again for ~6 mins, at which point the captain observed that the calf was injured. He described the injury as a "fresh gash" ~13-18 cm long and located ~30 cm behind the blowhole. He did not specifically mention the presence of blood.                                                                                                                                                                                                                                                                                                                             |
